# Supplementary material
Source: Royal Society of Chemistry journal article supplement (doi:10.1039/d6an00188b)
Supplement: d6an00188b1.xlsx [file d6an00188b1.xlsx]

## Sheet: without chaperone
		target RNA [nmol/L]	signal int. [-]
		x	y	sd (σ)		LOD [pmol/L]
n=5	blank	0.01	17.9633	2.25197		-
n=4	0.1 pmol/L	0.1	19.6997	4.95619
n=3	1 pmol/L	1	19.3257	4.45155
n=3	10 pmol/L	10	20.9597	5.15818
n=3	100 pmol/L	100	19.5928	4.80039
n=3	1 nmol/L	1000	21.0842	4.70082
n=3	10 nmol/L	10000	28.9165	8.78579
n=3	100 nmol/L	100000	29.7826	8.7856

## Sheet: with chaperone
			target RNA [nmol/L]	signal int. [-]
			x	y	sd (σ)		LOD [pmol/L]
	n=5	blank	0	22.197	3.41705		9.6
	n=4	0.1 pmol/L	0.1	19.807	8.9519
	n=3	1 pmol/L	1	22.4463	2.42492
	n=3	10 pmol/L	10	29.6965	3.72039
	n=3	100 pmol/L	100	37.3743	11.5525
	n=3	1 nmol/L	1000	35.3778	8.45226
	n=3	10 nmol/L	10000	36.6268	14.2086
	n=3	100 nmol/L	100000	38.1552	4.93204
